# Supplementary material for: A multifaceted menstrual health intervention to improve psychosocial outcomes and menstrual practices among secondary schoolgirls in Northwest Tanzania: a pilot intervention study
Source: Research Square preprint supplement (doi:10.21203/rs.3.rs-5554378/v1), 2025-03-25
Supplement: Supplementary file 1 [file 759da3b9754265a9eaef2fd1.pdf]

## Module 100: Demographic Data

|     |                                     |                                                                                                                                                                                                                                   |
|-----|-------------------------------------|-----------------------------------------------------------------------------------------------------------------------------------------------------------------------------------------------------------------------------------|
| 101 | Age (in complete years)             | _____                                                                                                                                                                                                                             |
| 102 | Date of birth                       | _ _ _ <br> DD MMM YYYY                                                                                                                                                                                                            |
| 103 | What is your tribe?                 | 1=Msukuma<br>2=Mhaya<br>3=Mjita<br>4=Mkara/Mkerewe<br>5=Mkuria/Mshashi<br>6=Mzinza<br>7=Mha<br>8= Other Tanzanian ethnic groups (please specify)<br><br>_____<br>9= Other East African ethnic group (Please specify)<br><br>_____ |
| 104 | What is your religious affiliation? | 1=Christian<br>2=Muslim<br>3=Other<br>(Specify) _____                                                                                                                                                                             |
| 105 | What form are you in?               | 1= Form three<br>2= Form four                                                                                                                                                                                                     |
| 106 | Who are you currently living with?  | 1= Both parents<br>2= Mother<br>3= Father                                                                                                                                                                                         |



|     |                                                   |                                                                                                                                                                                                                                 |
|-----|---------------------------------------------------|---------------------------------------------------------------------------------------------------------------------------------------------------------------------------------------------------------------------------------|
|     |                                                   | 4=Grand parents<br>5= Others<br>(Please specify) _____                                                                                                                                                                          |
| 107 | What is your mother's highest education level     | 1=No formal education<br>2= Primary<br>3= Secondary<br>4= Tertiary education<br>5= I don't know                                                                                                                                 |
| 108 | What is your father's highest education level     | 1=No formal education<br>2= Primary<br>3= Secondary<br>4= Tertiary education<br>5= I don't know                                                                                                                                 |
| 109 | What is your mother's occupation?                 | 1=Employment by government<br>2=Employment in private sector<br>3=Business woman<br>4= Fishing or related activities<br>5=Peasant farmer<br>6= Market vender<br>7= Unemployed<br>8=Other specify_____                           |
| 110 | What is your father occupation?                   | 1=Employment by government<br>2=Employment in private sector<br>3=Business woman<br>4= Fishing or related activities<br>5=Peasant farmer<br>6= Market vender<br>7= Unemployed<br>8=Other specify_____                           |
| 111 | Which of the following do you have in your house? | 1= Electricity<br>2= Running water inside the house<br>3= Refrigerator<br>4= TV<br>5= More than 10 chicken or other birds<br>6= Cows, goats, sheep, rabbits, pigs<br>7= Moving motorbike<br>8=Moving car<br>9= Land for farming |



## Module 200: Toilet and Washing Facilities at School

Here we ask you some questions about toilet and washing facilities at your school. Please be truthful with all your answers

| Circle the correct answer for each question. |                                                                                                                           | 0 = Never<br> | 1= Less than half the time<br> | 2= More than half the time<br> | 3= Always<br> |
|----------------------------------------------|---------------------------------------------------------------------------------------------------------------------------|------------------------------------------------------------------------------------------------|-------------------------------------------------------------------------------------------------------------------|-------------------------------------------------------------------------------------------------------------------|--------------------------------------------------------------------------------------------------|
| 202                                          | Is water available in your school for handwashing?                                                                        | 0                                                                                              | 1                                                                                                                 | 2                                                                                                                 | 3                                                                                                |
| 203                                          | Is water available in your school for you to wash your body and product during your period?                               | 0                                                                                              | 1                                                                                                                 | 2                                                                                                                 | 3                                                                                                |
| 204                                          | Is water in your school in a place that you can use in private to wash your body during your period?                      | 0                                                                                              | 1                                                                                                                 | 2                                                                                                                 | 3                                                                                                |
| 205                                          | Is water in your school in a place that you can use in private to wash your product during your period?                   | 0                                                                                              | 1                                                                                                                 | 2                                                                                                                 | 3                                                                                                |
| 206                                          | Is soap available in your school for handwashing?                                                                         | 0                                                                                              | 1                                                                                                                 | 2                                                                                                                 | 3                                                                                                |
| 207                                          | Is soap available in your school that you can use to wash your body and menstrual product during your period?             | 0                                                                                              | 1                                                                                                                 | 2                                                                                                                 | 3                                                                                                |
| 208                                          | Is soap available in your school in a place that you can use in private to wash your body during your period?             | 0                                                                                              | 1                                                                                                                 | 2                                                                                                                 | 3                                                                                                |
| 209                                          | Is soap available in your school somewhere that you can use in private to wash your menstrual product during your period? | 0                                                                                              | 1                                                                                                                 | 2                                                                                                                 | 3                                                                                                |



|                                                                          |                                                                                                |                                   |                                            |                                            |                                        |
|--------------------------------------------------------------------------|------------------------------------------------------------------------------------------------|-----------------------------------|--------------------------------------------|--------------------------------------------|----------------------------------------|
| 210                                                                      | Is toilet paper available for you to use in your school?                                       | 0                                 | 1                                          | 2                                          | 3                                      |
| 211                                                                      | Are there locks on the doors of the latrine or toilet that is available for you to use?        | 1= None of the Latrines has locks | 2= None of the latrines have working locks | 3= Some of the latrines have working locks | 4= All the latrines have working locks |
|                                                                          | Did you notice any changes in the toilet and water facilities in your school in the past year? | Yes, they are better              | Yes, they are worse                        | No, there was no change                    | Not sure                               |
| What changes did you notice in the toilets?                              |                                                                                                |                                   | No<br>0                                    | Yes<br>1                                   | I can't tell<br>88                     |
| a) They are cleaner                                                      |                                                                                                |                                   | 0                                          | 1                                          | 88                                     |
| b) There are more toilet cubicles with lockable door from inside         |                                                                                                |                                   | 0                                          | 1                                          | 88                                     |
| c) There is more water available closer to the toilet block and cubicles |                                                                                                |                                   | 0                                          | 1                                          | 88                                     |
| d) There are more bins to dispose things                                 |                                                                                                |                                   | 0                                          | 1                                          | 88                                     |
| e) There are Menstrual/ changing room                                    |                                                                                                |                                   | 0                                          | 1                                          | 88                                     |

## Module 300: Knowledge of Puberty & Menstruation

Now we will ask some questions about menstrual periods (monthly bleeding). For each statement, choose whether it is true or false or you don't know

|     |                                                                                   |            |           |                   |
|-----|-----------------------------------------------------------------------------------|------------|-----------|-------------------|
| 301 | Hormones cause the changes in our body during puberty.                            | False<br>0 | True<br>1 | I don't know<br>2 |
| 302 | The physical changes related to puberty usually start earlier in girls than boys. | False<br>0 | True<br>1 | I don't know<br>2 |



|     |                                                                                            |            |           |                   |
|-----|--------------------------------------------------------------------------------------------|------------|-----------|-------------------|
| 303 | Menstrual blood comes from the stomach                                                     | False<br>0 | True<br>1 | I don't know<br>2 |
| 304 | During her period a girl can get pregnant                                                  | False<br>0 | True<br>1 | I don't know<br>2 |
| 305 | Painkillers cause infertility                                                              | False<br>0 | True<br>1 | I don't know<br>2 |
| 306 | Every girl's period lasts the same number of days                                          | False<br>0 | True<br>1 | I don't know<br>2 |
| 307 | Every girl has the same number of days between her periods                                 | False<br>0 | True<br>1 | I don't know<br>2 |
| 308 | A boy's penis has two holes, one for urine and one for sperms                              | False<br>0 | True<br>1 | I don't know<br>2 |
| 309 | In boys, an erection (the penis becoming hard) is caused by their penis filling with blood | False<br>0 | True<br>1 | I don't know<br>2 |
| 310 | A boy's voice can change because of puberty                                                | False<br>0 | True<br>1 | I don't know<br>2 |

## Module 400: MENSTRUAL EXPERIENCES

|     |                                                                                                                            |                            |                      |                           |
|-----|----------------------------------------------------------------------------------------------------------------------------|----------------------------|----------------------|---------------------------|
| 401 | Have you started your periods?                                                                                             | No<br>0                    | Yes<br>1             | Not sure<br>2             |
| 402 | How old were you when you had your first period?                                                                           | Age in years:<br>[ _ _ ]   | Can't remember<br>88 | Haven't started yet<br>99 |
| 403 | How long was your last period?<br><b>If you have not yet started, go to Qn 405</b>                                         | Number of days:<br>[ _ _ ] | Can't remember<br>88 | Haven't started yet<br>99 |
| 404 | Which of the following did you use during your last menstrual period? (Circle the appropriate answer for every item below) |                            |                      |                           |
|     | a) AFRI pads or other re-usable pads                                                                                       | No = 0                     |                      | Yes = 1                   |



Page 6 of 22



appropriate to indicate: Never, which indicates NOT at all; less than half the time; more than half the time or always all the time

| During your last menstrual period.... |                                                                                                       | 0 =<br>Never<br><br> | 1 = Less<br>than half<br>the time<br><br> | 2 =<br>More<br>than<br>half the<br>time<br><br> | 3 =<br>Always<br><br> | 88 = I<br>don't<br>know | 99 =<br>Haven't<br>started<br>yet |
|---------------------------------------|-------------------------------------------------------------------------------------------------------|-------------------------------------------------------------------------------------------------------|----------------------------------------------------------------------------------------------------------------------------|------------------------------------------------------------------------------------------------------------------------------------|----------------------------------------------------------------------------------------------------------|-------------------------|-----------------------------------|
| 406                                   | Were your menstrual materials comfortable?                                                            | 0                                                                                                     | 1                                                                                                                          | 2                                                                                                                                  | 3                                                                                                        | 88                      | 99                                |
| 407                                   | Did you have enough of your menstrual materials to change them as often as you wanted to?             | 0                                                                                                     | 1                                                                                                                          | 2                                                                                                                                  | 3                                                                                                        | 88                      | 99                                |
| 408                                   | Were you satisfied with the cleanliness of your menstrual materials?                                  | 0                                                                                                     | 1                                                                                                                          | 2                                                                                                                                  | 3                                                                                                        | 88                      | 99                                |
| 409                                   | Could you get more of your menstrual materials when you needed to?                                    | 0                                                                                                     | 1                                                                                                                          | 2                                                                                                                                  | 3                                                                                                        | 88                      | 99                                |
| 410                                   | Did you worry that your menstrual materials would allow blood to pass through to your outer garments? | 0                                                                                                     | 1                                                                                                                          | 2                                                                                                                                  | 3                                                                                                        | 88                      | 99                                |
| 411                                   | Did you worry your menstrual materials would move from place while you were wearing them?             | 0                                                                                                     | 1                                                                                                                          | 2                                                                                                                                  | 3                                                                                                        | 88                      | 99                                |
| 412                                   | Did you feel comfortable carrying spare menstrual materials with you outside your home?               | 0                                                                                                     | 1                                                                                                                          | 2                                                                                                                                  | 3                                                                                                        | 88                      | 99                                |
| 413                                   | Did you feel comfortable carrying menstrual materials to the place where you changed them?            | 0                                                                                                     | 1                                                                                                                          | 2                                                                                                                                  | 3                                                                                                        | 88                      | 99                                |



| During your last menstrual period....                                                                             |                                                                                                                 | 0 =<br>Never<br> | 1 = Less<br>than half<br>the time<br> | 2 =<br>More<br>than<br>half the<br>time<br> | 3 =<br>Always<br> | 88 = I<br>don't<br>know | 99 =<br>Haven't<br>started<br>yet |
|-------------------------------------------------------------------------------------------------------------------|-----------------------------------------------------------------------------------------------------------------|---------------------------------------------------------------------------------------------------|------------------------------------------------------------------------------------------------------------------------|--------------------------------------------------------------------------------------------------------------------------------|------------------------------------------------------------------------------------------------------|-------------------------|-----------------------------------|
| 414                                                                                                               | Did you feel comfortable storing [keeping] your leftover or cleaned menstrual materials until your next period? | 0                                                                                                 | 1                                                                                                                      | 2                                                                                                                              | 3                                                                                                    | 88                      | 99                                |
| 415                                                                                                               | Were you able to wash your hands when you wanted to?                                                            | 0                                                                                                 | 1                                                                                                                      | 2                                                                                                                              | 3                                                                                                    | 88                      | 99                                |
| 416                                                                                                               | Were you able to immediately dispose of your used menstrual materials?                                          | 0                                                                                                 | 1                                                                                                                      | 2                                                                                                                              | 3                                                                                                    | 88                      | 99                                |
| 417                                                                                                               | Were you able to dispose of your used materials in the way that you wanted to?                                  | 0                                                                                                 | 1                                                                                                                      | 2                                                                                                                              | 3                                                                                                    | 88                      | 99                                |
| 418                                                                                                               | Were you worried about where to dispose of your used menstrual materials?                                       | 0                                                                                                 | 1                                                                                                                      | 2                                                                                                                              | 3                                                                                                    | 88                      | 99                                |
| 419                                                                                                               | Were you concerned that others would see your used menstrual materials in the place you disposed of them?       | 0                                                                                                 | 1                                                                                                                      | 2                                                                                                                              | 3                                                                                                    | 88                      | 99                                |
| <b>When at school (not in the boarding houses, this refers to class time) during you last menstrual period...</b> |                                                                                                                 |                                                                                                   |                                                                                                                        |                                                                                                                                |                                                                                                      |                         |                                   |
| 420                                                                                                               | When at school, were you able to change your menstrual materials when you wanted to?                            | 0                                                                                                 | 1                                                                                                                      | 2                                                                                                                              | 3                                                                                                    | 88                      | 99                                |
| 421                                                                                                               | When at school, were you satisfied with the place you used to change your menstrual materials?                  | 0                                                                                                 | 1                                                                                                                      | 2                                                                                                                              | 3                                                                                                    | 88                      | 99                                |



Page 9 of 22



| During your last menstrual period.... |                                                                                                 | 0 =<br>Never<br> | 1 = Less<br>than half<br>the time<br> | 2 =<br>More<br>than<br>half the<br>time<br> | 3 =<br>Always<br> | 88 = I<br>don't<br>know | 99 =<br>Haven't<br>started<br>yet |
|---------------------------------------|-------------------------------------------------------------------------------------------------|---------------------------------------------------------------------------------------------------|------------------------------------------------------------------------------------------------------------------------|--------------------------------------------------------------------------------------------------------------------------------|------------------------------------------------------------------------------------------------------|-------------------------|-----------------------------------|
| 426                                   | Did you have enough water to soak or wash your menstrual material?                              | 0                                                                                                 | 1                                                                                                                      | 2                                                                                                                              | 3                                                                                                    | 88                      | 99                                |
| 427                                   | Did you have access to a basin to soak or wash your menstrual materials whenever you needed it? | 0                                                                                                 | 1                                                                                                                      | 2                                                                                                                              | 3                                                                                                    | 88                      | 99                                |
| 428                                   | Were you able to wash your menstrual materials when you wanted to?                              | 0                                                                                                 | 1                                                                                                                      | 2                                                                                                                              | 3                                                                                                    | 88                      | 99                                |
| 429                                   | Did you have enough soap to wash your menstrual materials?                                      | 0                                                                                                 | 1                                                                                                                      | 2                                                                                                                              | 3                                                                                                    | 88                      | 99                                |
| 430                                   | Were you able to dry your materials when you wanted to?                                         | 0                                                                                                 | 1                                                                                                                      | 2                                                                                                                              | 3                                                                                                    | 88                      | 99                                |
| 431                                   | Were you worried that someone would see you while you were washing your menstrual materials?    | 0                                                                                                 | 1                                                                                                                      | 2                                                                                                                              | 3                                                                                                    | 88                      | 99                                |
| 432                                   | Were you worried that your menstrual materials would not be dry when you needed them?           | 0                                                                                                 | 1                                                                                                                      | 2                                                                                                                              | 3                                                                                                    | 88                      | 99                                |
| 433                                   | Were you worried that others would see your menstrual materials while they were drying?         | 0                                                                                                 | 1                                                                                                                      | 2                                                                                                                              | 3                                                                                                    | 88                      | 99                                |
| 434                                   | When at home, were you able to change your menstrual materials when you wanted to?              | 0                                                                                                 | 1                                                                                                                      | 2                                                                                                                              | 3                                                                                                    | 88                      | 99                                |
| 435                                   | When at home, were you satisfied with the place you used to change your menstrual materials?    | 0                                                                                                 | 1                                                                                                                      | 2                                                                                                                              | 3                                                                                                    | 88                      | 99                                |



| During your last menstrual period.... |                                                                                                                                                               | 0 =<br>Never<br><br> | 1 = Less<br>than half<br>the time<br><br> | 2 =<br>More<br>than<br>half the<br>time<br><br> | 3 =<br>Always<br><br> | 88 = I<br>don't<br>know | 99 =<br>Haven't<br>started<br>yet |
|---------------------------------------|---------------------------------------------------------------------------------------------------------------------------------------------------------------|-------------------------------------------------------------------------------------------------------|----------------------------------------------------------------------------------------------------------------------------|------------------------------------------------------------------------------------------------------------------------------------|----------------------------------------------------------------------------------------------------------|-------------------------|-----------------------------------|
| 436                                   | When at home, did you have a clean place to change your menstrual materials?                                                                                  | 0                                                                                                     | 1                                                                                                                          | 2                                                                                                                                  | 3                                                                                                        | 88                      | 99                                |
| 437                                   | When at home, were you worried that you would not be able to change your menstrual materials when you needed to?                                              | 0                                                                                                     | 1                                                                                                                          | 2                                                                                                                                  | 3                                                                                                        | 88                      | 99                                |
| 438                                   | When at home, were you worried that someone would see you while you were changing your menstrual materials?                                                   | 0                                                                                                     | 1                                                                                                                          | 2                                                                                                                                  | 3                                                                                                        | 88                      | 99                                |
| 439                                   | When at home, were you worried that someone would harm you while you were changing your menstrual materials?                                                  | 0                                                                                                     | 1                                                                                                                          | 2                                                                                                                                  | 3                                                                                                        | 88                      | 99                                |
| 440                                   | When at home, were you worried that something else would harm you while you were changing your menstrual materials (e.g., animals, insects, unsafe structure) | 0                                                                                                     | 1                                                                                                                          | 2                                                                                                                                  | 3                                                                                                        | 88                      | 99                                |
| 441                                   | Were you worried about how you would get more of your menstrual material if you ran out?                                                                      | 0                                                                                                     | 1                                                                                                                          | 2                                                                                                                                  | 3                                                                                                        | 88                      | 99                                |

## Module 500: Self-Efficacy

|  |  |                            |                       |           |                   |                 |                                 |
|--|--|----------------------------|-----------------------|-----------|-------------------|-----------------|---------------------------------|
|  |  | Not<br>Confident<br>at all | Not very<br>confident | Confident | Very<br>Confident | I don't<br>Know | Haven't<br>started<br>yet<br>99 |
|--|--|----------------------------|-----------------------|-----------|-------------------|-----------------|---------------------------------|



| During your last menstrual period.... |                                                                                                                                                                       | 0 =<br>Never<br><br> | 1 = Less<br>than half<br>the time<br><br> | 2 =<br>More<br>than<br>half the<br>time<br><br> | 3 =<br>Always<br><br> | 88 = I<br>don't<br>know | 99 =<br>Haven't<br>started<br>yet |
|---------------------------------------|-----------------------------------------------------------------------------------------------------------------------------------------------------------------------|-------------------------------------------------------------------------------------------------------|----------------------------------------------------------------------------------------------------------------------------|------------------------------------------------------------------------------------------------------------------------------------|----------------------------------------------------------------------------------------------------------|-------------------------|-----------------------------------|
| 501                                   | How confident are you that, if necessary, you're able to ask a female friend for a menstrual material (such as: pad, cloth, tissue, cotton, etc.)?                    | 0                                                                                                     | 1                                                                                                                          | 2                                                                                                                                  | 3                                                                                                        | 88                      | 99                                |
| 502                                   | How confident are you that you can ask for help from a female teacher if you face a menstrual-related problem at school?                                              | 0                                                                                                     | 1                                                                                                                          | 2                                                                                                                                  | 3                                                                                                        | 88                      | 99                                |
| 503                                   | How confident are you that you can roughly predict when your period is about to start?                                                                                | 0                                                                                                     | 1                                                                                                                          | 2                                                                                                                                  | 3                                                                                                        | 88                      | 99                                |
| 504                                   | How confident are you that if a teacher asks a question in class, you can stand up to answer during your period without worrying that you have stained your clothing? | 0                                                                                                     | 1                                                                                                                          | 2                                                                                                                                  | 3                                                                                                        | 88                      | 99                                |

## Module 600: MSRH Symptoms

|                                                                                           |                                            |                             |                             |                                    |                           |
|-------------------------------------------------------------------------------------------|--------------------------------------------|-----------------------------|-----------------------------|------------------------------------|---------------------------|
| From the start of your last period until now, have you experienced any of these symptoms? |                                            |                             |                             |                                    |                           |
| 601                                                                                       | Bleeding between your periods              | 0 = I have not experienced  | 1 = Yes, I have experienced |                                    | 99 = Haven't started yet  |
| Please choose from the following options to answer the next set of questions:             |                                            | I have not experienced<br>0 | Yes, during my period<br>1  | Yes, but not during my period<br>2 | Haven't started yet<br>99 |
| 602                                                                                       | Vaginal discharge that is green, or yellow | 0                           | 1                           | 2                                  | 99                        |



|     |                                                                      |   |   |   |    |
|-----|----------------------------------------------------------------------|---|---|---|----|
| 603 | Vaginal discharge that is thick, white and clumpy                    | 0 | 1 | 2 | 99 |
| 604 | Vaginal discharge that has a strong, bad smell (fishy smell)         | 0 | 1 | 2 | 99 |
| 605 | Burning sensation whilst urinating                                   | 0 | 1 | 2 | 99 |
| 606 | General itching or burning sensation in your genital area            | 0 | 1 | 2 | 99 |
| 607 | Sores, blisters, or ulcers in the genital area or inside your vagina | 0 | 1 | 2 | 99 |
| 608 | Rash or redness in your genital area                                 | 0 | 1 | 2 | 99 |

## Module 700 Menstrual Pain

**In this section we are asking you about any menstrual pain or cramping you experienced during your last menstrual period, and if you did have pain, how you handled it.**

|     |                                                                                                                                                          |                                        |                                                    |                    |                          |                               |
|-----|----------------------------------------------------------------------------------------------------------------------------------------------------------|----------------------------------------|----------------------------------------------------|--------------------|--------------------------|-------------------------------|
| 701 | How would you rate your pain during your last period?<br>On a scale of 0 to 10 with 0 being no pain at all, and 10 being the worst pain you've ever felt |                                        | <div>0 1 2 3 4 5 6 7 8 9 10</div> <div>_____</div> |                    | Can't remember<br><br>88 | Haven't started yet<br><br>99 |
| 702 | Were you able to reduce your pain during your last period?<br>If 99 go to qn 801                                                                         | I was not able to reduce the pain<br>0 | Yes, I reduced the pain<br>1                       | I had no pain<br>2 | Can't remember<br><br>88 | Haven't started yet<br><br>99 |
| 703 | What did you do to help the pain during your last period? (Circle the appropriate answer for each of the items below)                                    |                                        |                                                    |                    |                          |                               |
|     | a) Nothing (if yes, skip to 801)                                                                                                                         |                                        |                                                    | No = 0             |                          | Yes = 1                       |
|     | b) Painkiller                                                                                                                                            |                                        |                                                    | No = 0             |                          | Yes = 1                       |
|     | c) Drinking lots of clean water                                                                                                                          |                                        |                                                    | No = 0             |                          | Yes = 1                       |
|     | d) Applying heat to the stomach                                                                                                                          |                                        |                                                    | No = 0             |                          | Yes = 1                       |



|     |                                                                                                                 |        |         |
|-----|-----------------------------------------------------------------------------------------------------------------|--------|---------|
|     | e) Exercise and stretching                                                                                      | No = 0 | Yes = 1 |
|     | f) Relaxing                                                                                                     | No = 0 | Yes = 1 |
|     | g) Eating foods with lots of water, like watermelon                                                             | No = 0 | Yes = 1 |
|     | h) Avoiding sugar                                                                                               | No = 0 | Yes = 1 |
|     | i) Taking antibiotics                                                                                           | No = 0 | Yes = 1 |
|     | j) Breathing exercises                                                                                          | No = 0 | Yes = 1 |
|     | Other (please specify) _____                                                                                    |        |         |
| 704 | Which painkiller did you use? Select all that apply (circle the appropriate answer for each of the items below) |        |         |
|     | a) Panadol/Paracetamol                                                                                          | No = 0 | Yes = 1 |
|     | b) Ibuprofen                                                                                                    | No = 0 | Yes = 1 |
|     | c) Aspirin                                                                                                      | No = 0 | Yes = 1 |
|     | d) Diclofenac                                                                                                   | No = 0 | Yes = 1 |
|     | e) Traditional/herbal medicine                                                                                  | No = 0 | Yes = 1 |

## Module 800 Participation

|                                                                                                                      |                                                                                                                                                   |                            |                      |                           |
|----------------------------------------------------------------------------------------------------------------------|---------------------------------------------------------------------------------------------------------------------------------------------------|----------------------------|----------------------|---------------------------|
| In this section, we want to ask you about how your period affects how you are able to take part in daily activities. |                                                                                                                                                   |                            |                      |                           |
| 801                                                                                                                  | During your last period, how many days of school did you miss because of your period?<br>(If you didn't miss any school insert 0 and go to Qn803) | Number of days:<br>[_____] | Can't remember<br>88 | Haven't started yet<br>99 |
| 802                                                                                                                  | Why did you miss those days of school? (Circle appropriate answer for each of the items below)                                                    |                            |                      |                           |
|                                                                                                                      | a) Pain or cramping                                                                                                                               | No = 0                     | Yes = 1              |                           |
|                                                                                                                      | b) Ashamed or embarrassed                                                                                                                         | No = 0                     | Yes = 1              |                           |



|     |                                                                                                                                                          |                            |                                                   |
|-----|----------------------------------------------------------------------------------------------------------------------------------------------------------|----------------------------|---------------------------------------------------|
|     | c) No menstrual product to use                                                                                                                           | No = 0                     | Yes = 1                                           |
|     | d) I was not allowed to go to school                                                                                                                     | No = 0                     | Yes = 1                                           |
|     | e) No place to wash or change                                                                                                                            | No = 0                     | Yes = 1                                           |
|     | f) Scared of leaking                                                                                                                                     | No = 0                     | Yes = 1                                           |
|     | g) Felt unwell or uncomfortable                                                                                                                          | No = 0                     | Yes = 1                                           |
|     | h) Don't remember                                                                                                                                        | No = 0                     | Yes = 1                                           |
| 803 | During your last period, how many days of school did you leave early, because of your period? (If this did not happen, insert 0 and go to Qn 805)        | Number of days:<br>[_____] | Can't remember<br>88<br>Haven't started yet<br>99 |
| 804 | Why did you leave early on those days of school? Circle the appropriate answer for each of the items below).                                             |                            |                                                   |
|     | a) Pain or cramping                                                                                                                                      | No = 0                     | Yes = 1                                           |
|     | b) Ashamed or embarrassed                                                                                                                                | No = 0                     | Yes = 1                                           |
|     | c) No menstrual product to use                                                                                                                           | No = 0                     | Yes = 1                                           |
|     | d) Told to go home/ Sent home                                                                                                                            | No = 0                     | Yes = 1                                           |
|     | e) No place to wash or change                                                                                                                            | No = 0                     | Yes = 1                                           |
|     | f) Scared of leaking                                                                                                                                     | No = 0                     | Yes = 1                                           |
|     | g) Felt unwell or uncomfortable                                                                                                                          | No = 0                     | Yes = 1                                           |
|     | h) Don't remember                                                                                                                                        | No = 0                     | Yes = 1                                           |
| 805 | During your last period, what activities did you not participate in, because of your period? (Circle the appropriate answer for each of the items below) |                            |                                                   |
|     | household chores (dishes, laundry, etc.)                                                                                                                 | No = 0                     | Yes = 1                                           |
|     | religious happenings (going to church, going to mosque, personal prayers)                                                                                | No = 0                     | Yes = 1                                           |
|     | sports (football, swimming, running, etc.)                                                                                                               | No = 0                     | Yes = 1                                           |
|     | socialising with friends                                                                                                                                 | No = 0                     | Yes = 1                                           |



806 | Why did you miss out on these activities? (Circle the appropriate answer for each of the items below)

## Module 900: Menstrual Anxiety

**In this section, we would like to ask you some questions about how you felt during your last period.**

|     |                                      |   |   |   |   |    |    |
|-----|--------------------------------------|---|---|---|---|----|----|
| 901 | Feeling nervous, anxious, or on edge | 0 | 1 | 2 | 3 | 88 | 99 |
|-----|--------------------------------------|---|---|---|---|----|----|



|     |                                                                                                                                                                           |                           |                         |                     |                          |                    |                           |
|-----|---------------------------------------------------------------------------------------------------------------------------------------------------------------------------|---------------------------|-------------------------|---------------------|--------------------------|--------------------|---------------------------|
| 904 | Being so restless that it's hard to sit still                                                                                                                             | 0                         | 1                       | 2                   | 3                        | 88                 | 99                        |
| 905 | Becoming easily annoyed or irritable                                                                                                                                      | 0                         | 1                       | 2                   | 3                        | 88                 | 99                        |
| 906 | Feeling afraid as though something awful might happen                                                                                                                     | 0                         | 1                       | 2                   | 3                        | 88                 | 99                        |
| 907 | If you have been bothered by any of these things during your last period, how difficult did they make it for you to do your schoolwork, chores, or get along with people? | Not difficult at all<br>0 | Somewhat Difficult<br>1 | Very Difficult<br>2 | Extremely difficult<br>3 | Not bothered<br>88 | Haven't yet started<br>99 |

## Module 1000: School Climate

**In this section, we are asking you to think about your school and your relationship with the teachers and other students. We will also ask you about your views and experience regarding how other people in your school behave towards girls who are menstruating**

|      |                                                                                              | No | Yes | I can't tell |
|------|----------------------------------------------------------------------------------------------|----|-----|--------------|
|      |                                                                                              | 0  | 1   | 88           |
| 1001 | The teachers at this school are fair in dealing with students                                | 0  | 1   | 88           |
| 1002 | There's at least one teacher or other adult in this school I can talk to if I have a problem | 0  | 1   | 88           |
| 1003 | I feel I can go to my teachers with the things that are on my mind                           | 0  | 1   | 88           |
| 1004 | In this school, teachers believe all students can learn                                      | 0  | 1   | 88           |
| 1005 | In this school, students' ideas are listened to and valued                                   | 0  | 1   | 88           |
| 1006 | In this school, teachers and students really trust one another                               | 0  | 1   | 88           |
| 1007 | In this school, teachers treat students with respect                                         | 0  | 1   | 88           |
| 1008 | This school really cares about students as individuals                                       | 0  | 1   | 88           |



|      |                                                                                                                                                                  |                      |         |
|------|------------------------------------------------------------------------------------------------------------------------------------------------------------------|----------------------|---------|
|      | <b>Behaviour toward girls during menstruation</b>                                                                                                                |                      |         |
| 1009 | In the last 12 months, have you been teased/made fun of by other people because of menstruation?                                                                 | No= 0 (skip to qn13) | Yes=1   |
| 1010 | Thinking of the times this has happened in the last 12 months, what were the reasons for teasing?<br>(Circle the appropriate answer for each of the items below) |                      |         |
|      | a) Stains on the dress/skirt                                                                                                                                     | No = 0               | 1 = Yes |
|      | b) Odour                                                                                                                                                         | No = 0               | Yes = 1 |
|      | c) Had a menstrual product in my school bag                                                                                                                      | No = 0               | Yes = 1 |
|      | d) Was asking for an emergency pad                                                                                                                               | No = 0               | Yes = 1 |
|      | e) Had missed a class                                                                                                                                            | No = 0               | Yes = 1 |
|      | f) Asked for permission to go home                                                                                                                               | No = 0               | Yes = 1 |
|      | g) Others (Please specify)<br>_____                                                                                                                              |                      |         |
| 1011 | Thinking of the times this has happened in the last year, who teased you? (Circle the appropriate answer for each of the items below)                            |                      |         |
|      | a) Other girls                                                                                                                                                   | No = 0               | Yes = 1 |
|      | b) Boys                                                                                                                                                          | No = 0               | Yes = 1 |
|      | c) Male teacher                                                                                                                                                  | No = 0               | Yes = 1 |
|      | d) Female teacher                                                                                                                                                | No = 0               | Yes = 1 |
| 1012 | How did the teasing/bullying make you feel?                                                                                                                      |                      |         |
|      | a) Humiliated and ashamed                                                                                                                                        | No = 0               | Yes = 1 |
|      | b) Fear                                                                                                                                                          | No = 0               | Yes = 1 |
|      | c) Worry / tension                                                                                                                                               | No = 0               | Yes = 1 |
|      | d) I was not bothered                                                                                                                                            | No = 0               | Yes = 1 |
|      | e) Others (Please specify) _____                                                                                                                                 |                      |         |



|                                                                       |                                                                                                           |                       |         |
|-----------------------------------------------------------------------|-----------------------------------------------------------------------------------------------------------|-----------------------|---------|
| 1013                                                                  | In the 12 months, have you ever teased or made fun of another girl due to menstruation?                   | No = 0 [Skip to 1015] | Yes = 1 |
| 1014                                                                  | Thinking of the times this has happened in the last 12 months, what were the reasons for teasing?         |                       |         |
|                                                                       | a) Stains on the dress/Skirt                                                                              | No = 0                | Yes = 1 |
|                                                                       | b) Odour                                                                                                  | No = 0                | Yes = 1 |
|                                                                       | c) Had a menstrual product in by school bag                                                               | No = 0                | Yes = 1 |
|                                                                       | d) Was asking for an emergency pad                                                                        | No = 0                | Yes = 1 |
|                                                                       | e) Had missed a class                                                                                     | No = 0                | Yes = 1 |
|                                                                       | f) Asked for permission to go home                                                                        | No = 0                | Yes = 1 |
|                                                                       | g) Others (Please specify) _____                                                                          |                       |         |
| 1015                                                                  | In the last 12 months, have you ever witnessed another girl being teased/made fun of due to menstruation? | No = 0                | Yes = 1 |
| <b>Module 1100: Acceptability and appropriateness of Intervention</b> |                                                                                                           |                       |         |
| 1101                                                                  | Did you receive a menstrual kit from Femme?                                                               | No = 0                | Yes = 1 |
| 1102                                                                  | What was in the kit?                                                                                      |                       |         |
|                                                                       | a) Soap                                                                                                   | No = 0                | Yes = 1 |
|                                                                       | b) Menstrual cup                                                                                          | No = 0                | Yes = 1 |
|                                                                       | c) Underwear                                                                                              | No = 0                | Yes = 1 |
|                                                                       | d) AFRI pad pack                                                                                          | No = 0                | Yes = 1 |
|                                                                       | e) Bowl                                                                                                   | No = 0                | Yes = 1 |
|                                                                       | f) Soap dish                                                                                              | No = 0                | Yes = 1 |
|                                                                       | g) Small towel                                                                                            | No = 0                | Yes = 1 |
|                                                                       | h) Workbook                                                                                               | No = 0                | Yes = 1 |
| 1103                                                                  | Which items from your menstrual kit do you still have?                                                    |                       |         |
|                                                                       | a) AFRipad pack                                                                                           | No = 0                | Yes = 1 |



|      |                                                                                         |        |         |
|------|-----------------------------------------------------------------------------------------|--------|---------|
|      | b) Menstrual cup                                                                        | No = 0 | Yes = 1 |
|      | c) Underwear                                                                            | No = 0 | Yes = 1 |
|      | d) Bowl                                                                                 | No = 0 | Yes = 1 |
|      | e) Soap dish                                                                            | No = 0 | Yes = 1 |
|      | f) Small towel                                                                          | No = 0 | Yes = 1 |
|      | g) Workbook                                                                             | No = 0 | Yes = 1 |
| 1104 | Of the two types of menstrual products you received, which one did you try immediately? |        |         |
|      | a) Cup                                                                                  | No = 0 | Yes = 1 |
|      | b) AFRI pads                                                                            | No = 0 | Yes = 1 |
|      | c) Both                                                                                 | No = 0 | Yes = 1 |
|      | d) None                                                                                 | No = 0 | Yes = 1 |
| 1105 | Of the two types menstrual product you received, which have you been using regularly?   |        |         |
|      | a) Menstrual cup                                                                        | No = 0 | Yes = 1 |
|      | b) AFRI pads                                                                            | No = 0 | Yes = 1 |
|      | c) Both                                                                                 | No = 0 | Yes = 1 |
|      | d) None                                                                                 | No = 0 | Yes = 1 |
| 1106 | What did you use at your last menstrual period?                                         |        |         |
|      | a) Menstrual cup                                                                        | No = 0 | Yes = 1 |
|      | b) AFRI pads                                                                            | No = 0 | Yes = 1 |
|      | c) Both                                                                                 | No = 0 | Yes = 1 |
|      | d) Neither of these                                                                     |        |         |
| 1107 | In the last 12 months, have you experienced pain during menstruation?                   | No = 0 | Yes = 1 |
| 1108 | Thinking of the times you experienced pain; did you use painkillers provided by school? | No = 0 | Yes = 1 |
| 1109 | If yes, which pain killers did you use?                                                 |        |         |



|      |                                                                    |                     |          |                            |       |                  |
|------|--------------------------------------------------------------------|---------------------|----------|----------------------------|-------|------------------|
|      | a) Panadol/Paracetamol                                             | No = 0              | Yes = 1  |                            |       |                  |
|      | b) Ibuprofen                                                       | No = 0              | Yes = 1  |                            |       |                  |
| 1110 | Who provided the painkillers?                                      |                     |          |                            |       |                  |
|      | a) Head teacher                                                    | No = 0              | Yes = 1  |                            |       |                  |
|      | b) Class teacher                                                   | No = 0              | Yes = 1  |                            |       |                  |
|      | c) Teacher in charge of health                                     | No = 0              | Yes = 1  |                            |       |                  |
|      | d) Student leader                                                  | No = 0              | Yes = 1  |                            |       |                  |
|      | e) Others (Please specify) _____                                   |                     |          |                            |       |                  |
| 1111 | For the following statement circle the appropriate answer          | Completely disagree | Disagree | Neither agree nor disagree | Agree | Completely agree |
|      | a) The education session provided by Femme met my expectations     |                     |          |                            |       |                  |
|      | b) The education session provided by Femme were interesting to me. |                     |          |                            |       |                  |
|      | c) I liked the education session provided by Femme                 |                     |          |                            |       |                  |
|      | d) The Femme education sessions should be provided regularly       |                     |          |                            |       |                  |
|      | e) Femme menstrual kit met my needs                                |                     |          |                            |       |                  |
|      | f) I liked the Femme menstrual kit                                 |                     |          |                            |       |                  |
|      | g) Femme education sessions were right for me                      |                     |          |                            |       |                  |
|      | h) Femme education sessions were suitable                          |                     |          |                            |       |                  |
|      | i) Femme education sessions were interactive and engaging          |                     |          |                            |       |                  |
|      | j) Femme menstrual kit were right for me                           |                     |          |                            |       |                  |
|      | k) Femme menstrual kit were suitable                               |                     |          |                            |       |                  |
|      | l) Femme menstrual kit were applicable                             |                     |          |                            |       |                  |



|  |                                                                                |  |  |  |  |  |
|--|--------------------------------------------------------------------------------|--|--|--|--|--|
|  | m) Femme facilitators were able to answer all my questions during the sessions |  |  |  |  |  |
|  | n) Femme facilitators were supportive during the sessions                      |  |  |  |  |  |

*Thank you for participating*
